# Supplementary material for: Mixed Depression in Bipolar Disorder: Prevalence Rate and Clinical Correlates During Naturalistic Follow-Up in the Stanley Bipolar Network
Source: Atypon-hosted journal article supplement (doi:10.1176/appi.ajp.2016.15091119), 2016-04-15
Supplement: appi.ajp.2016.15091119.ds001.pdf [file appi.ajp.2016.15091119.ds001.pdf]

**Figure S1.**

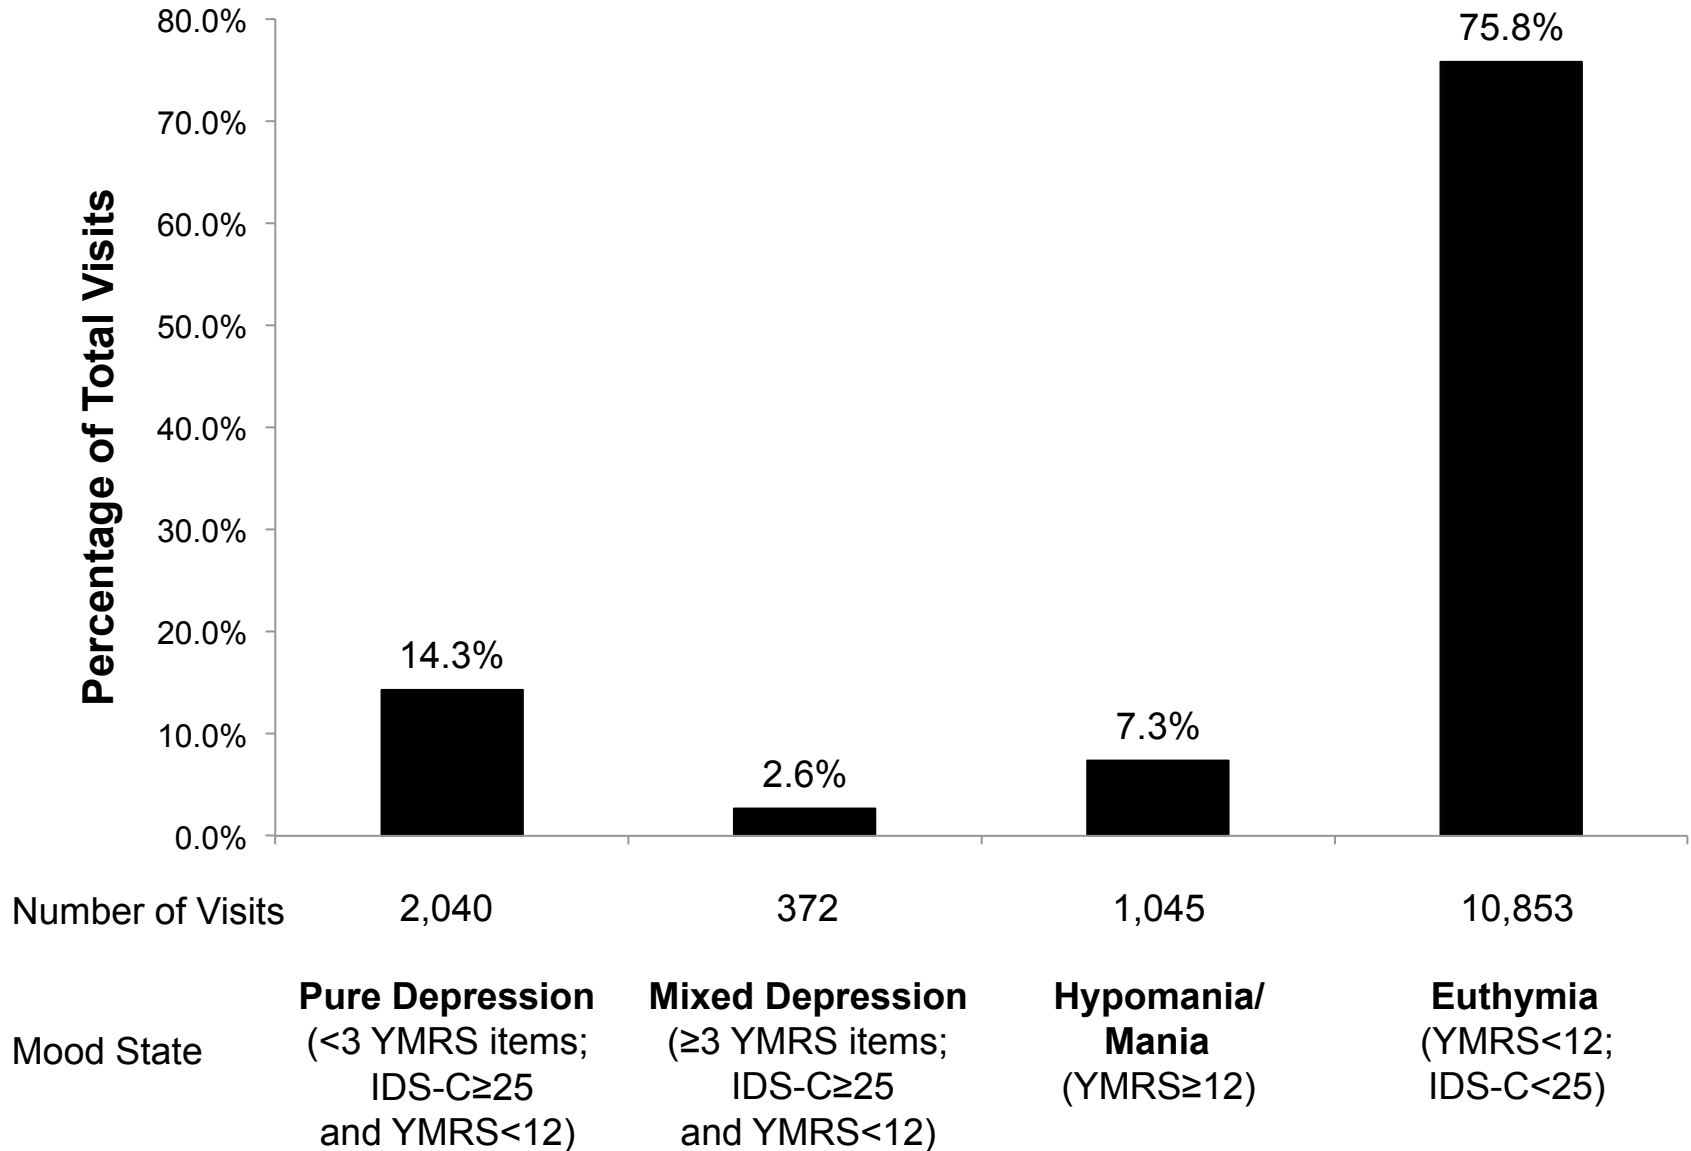

Affective states in 907 patients during 14,310 visits, applying a 3-symptom DSM-5-based definition of mixed depression, and an IDS-C threshold of  $\geq 25$  for depression. Mixed depression is defined here as IDS-C  $\geq 25$  and YMRS  $< 12$ , with  $\geq 3$  nonoverlapping YMRS items scored 1 at the same visit. “IDS-C” indicates Inventory of Depressive Symptomatology – Clinician-Rated Version; “YMRS,” Young Mania Rating Scale.

**Figure S2.**

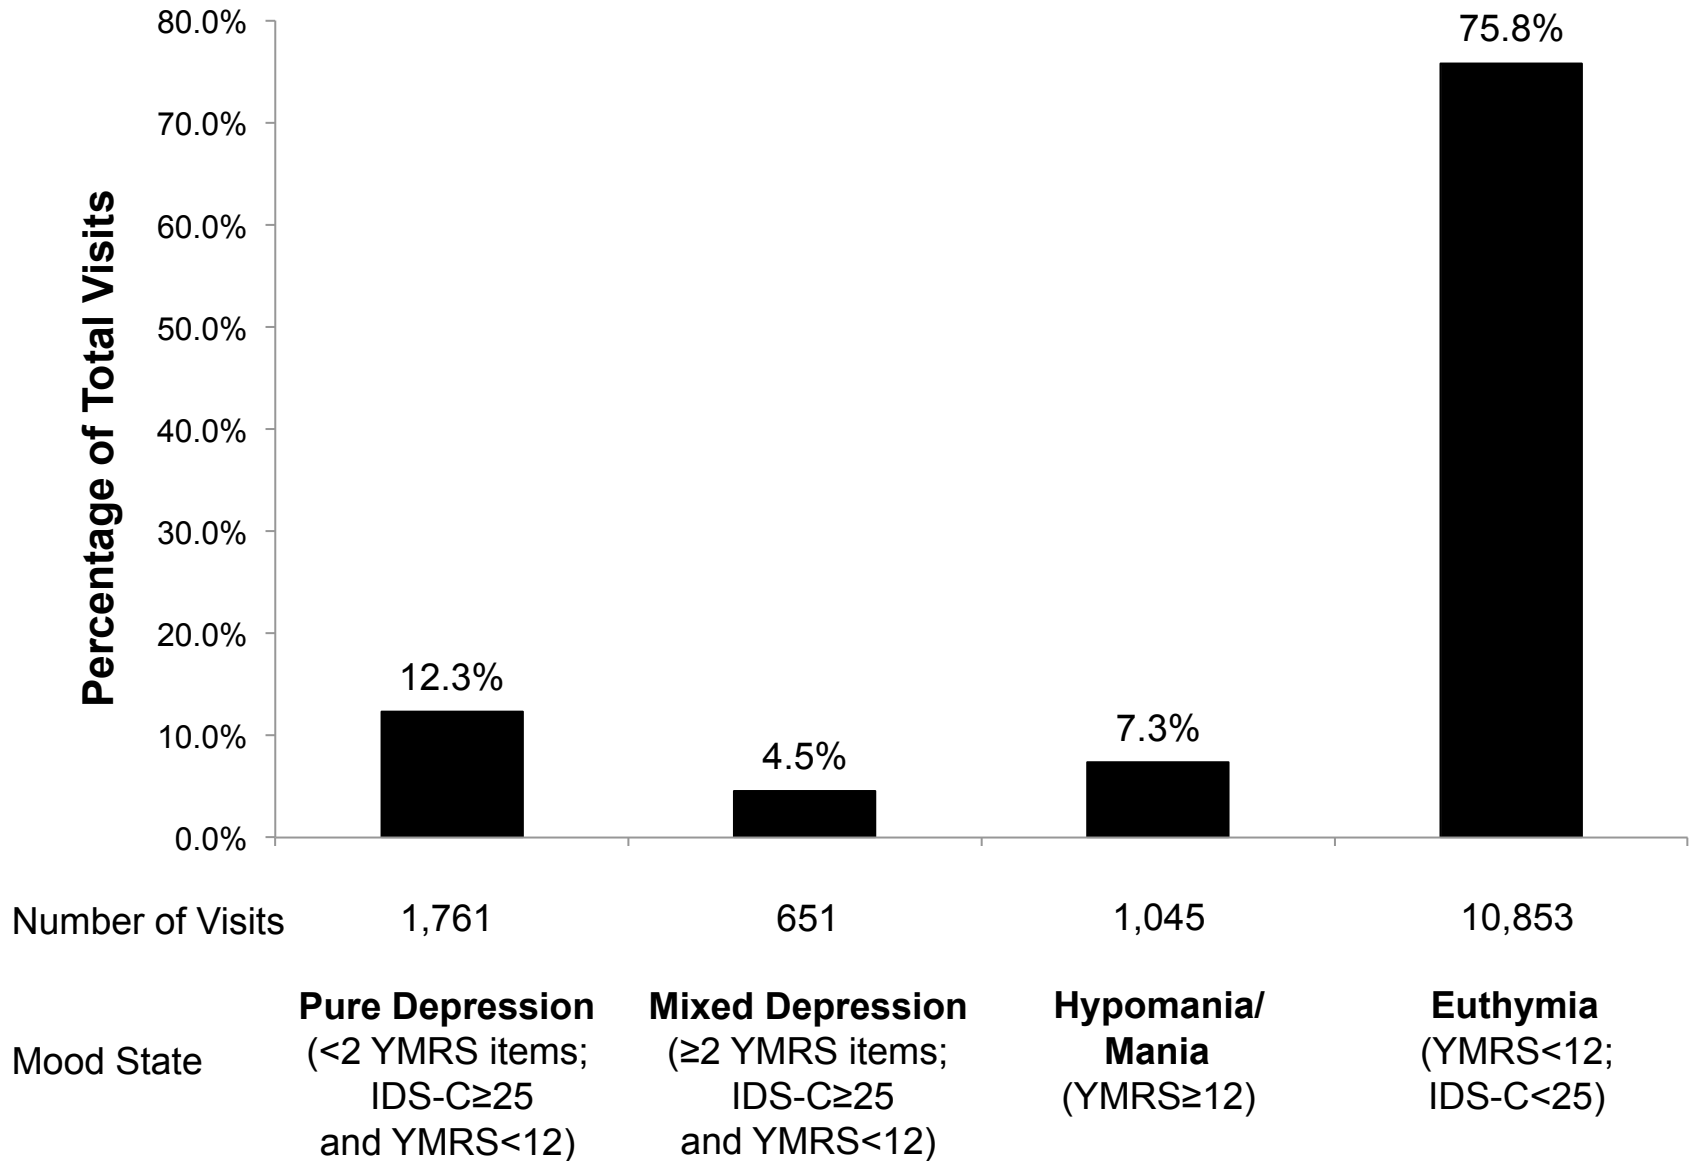

Affective states in 907 patients during 14,310 visits, applying a 2-symptom DSM-5-based definition of mixed depression, and an IDS-C threshold of  $\geq 25$  for depression. Mixed depression is defined here as IDS-C  $\geq 25$  and YMRS $<12$ , with  $\geq 2$  nonoverlapping YMRS items scored  $\geq 1$  at the same visit. “IDS-C” indicates Inventory of Depressive Symptomatology – Clinician-Rated Version; “YMRS,” Young Mania Rating Scale.
